# Supplementary material for: Facile synthesis of meso-porous ZnO nano-triangular prisms with enhanced photocatalytic activity
Source: Royal Society of Chemistry journal article supplement (doi:10.1039/c5ra02042e), 2015-01-01

### Supporting Information

Table S1. Difference in diffraction peak intensities of ZnO-nt, ZnO-nr and ZnO-np

| S.No | Diffraction peak | Peak Intensity |         |         |
|------|------------------|----------------|---------|---------|
|      |                  | ZnO-nt         | ZnO-nr  | ZnO-np  |
| 1    | 100              | 2775.52        | 4915.02 | 5614.84 |
| 2    | 002              | 2025.81        | 4419.08 | 4234.33 |
| 3    | 101              | 4475.05        | 8000.29 | 8982.01 |
| 4    | 102              | 1015.08        | 1662.70 | 1540.02 |
| 5    | 110              | 1413.86        | 2377.90 | 2520.30 |
| 6    | 103              | 1168.79        | 1965.48 | 2001.16 |
| 7    | 200              | 234.91         | 339.32  | 437.93  |
| 8    | 112              | 938.22         | 1607.88 | 1632.83 |
| 9    | 201              | 524.94         | 751.74  | 899.07  |
| 10   | 004              | 127.61         | 200.98  | 162.41  |
| 11   | 202              | 204.46         | 229.69  | 284.22  |

Fig. S1. XRD patterns of (a) ZnO-nt (b) ZnO-nr (c) ZnO-np

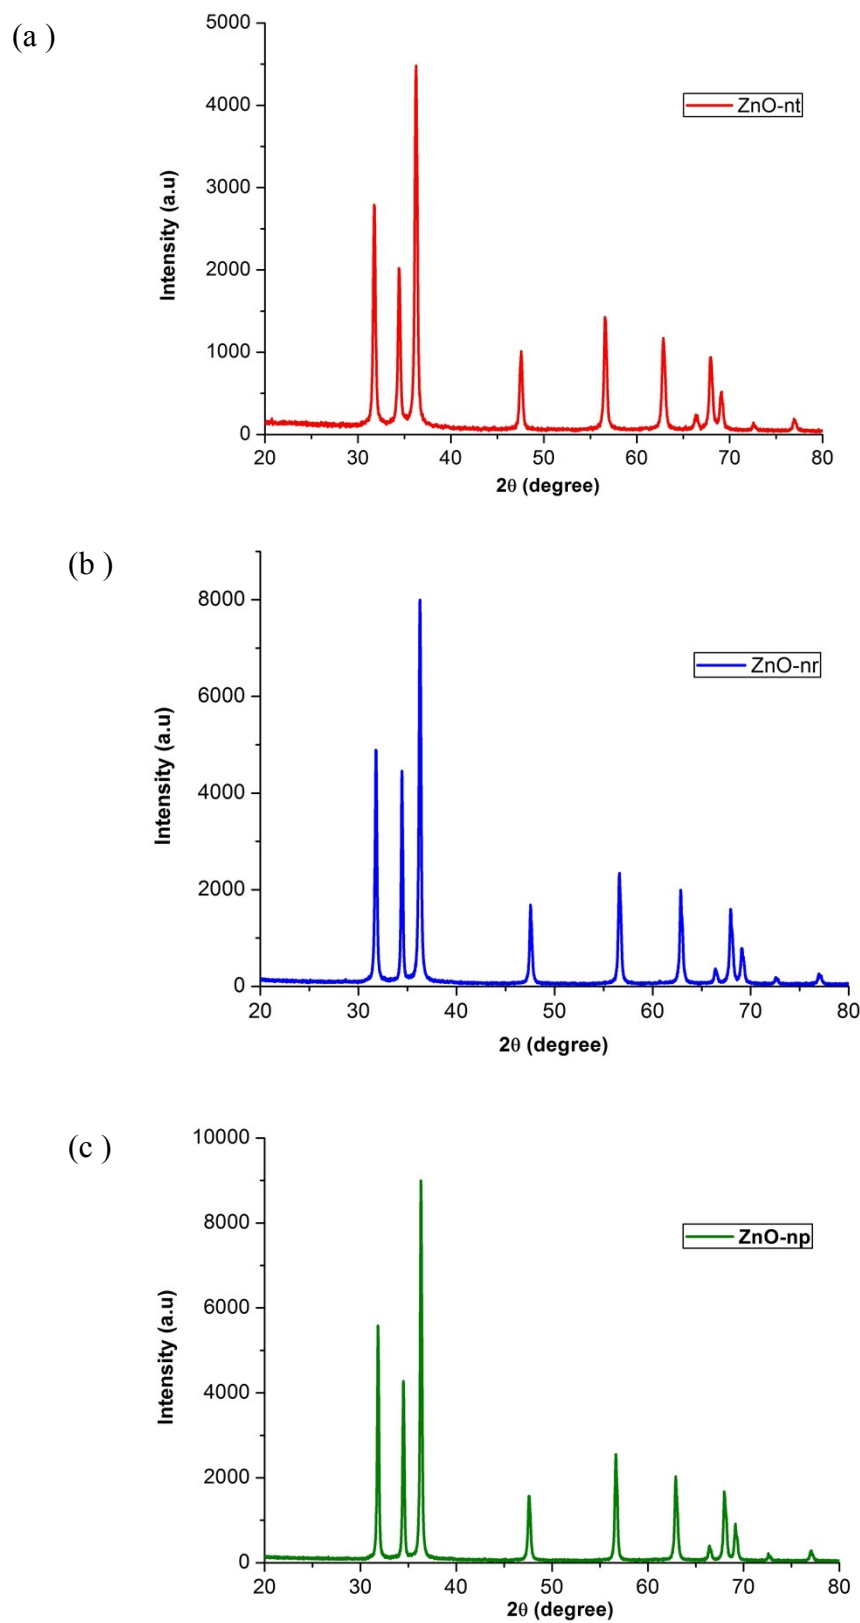

Fig. S2. N<sub>2</sub> adsorption – desorption isotherms of ZnO-nt, ZnO-nr and ZnO-np.

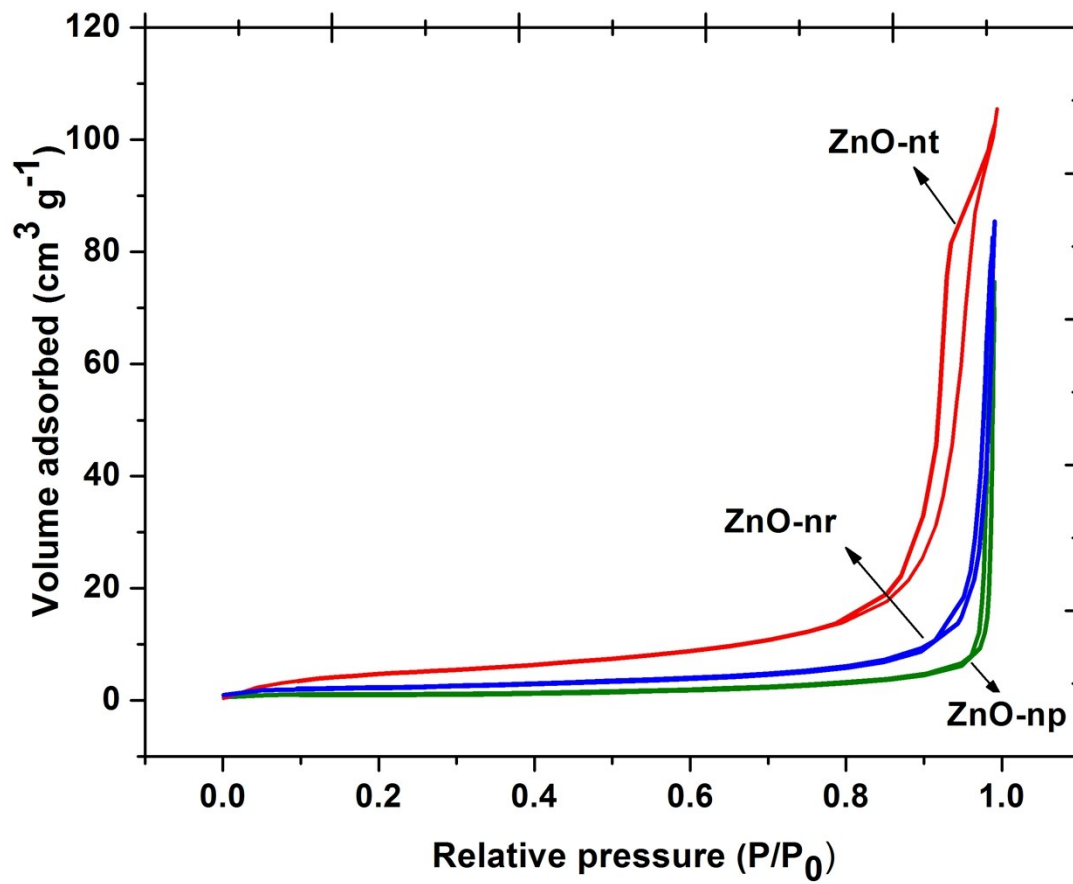

Supplement: c5ra02042e1.pdf [file c5ra02042e1.pdf]
